# Supplementary material for: Helminth infections and gut microbiota – a feline perspective
Source: PubMed Central journal article supplement (PMC5135779; doi:10.1186/s13071-016-1908-4), 2016-12-03
Supplement: 13071_2016_1908_MOESM2_ESM.pdf [file 13071_2016_1908_MOESM2_ESM.pdf]

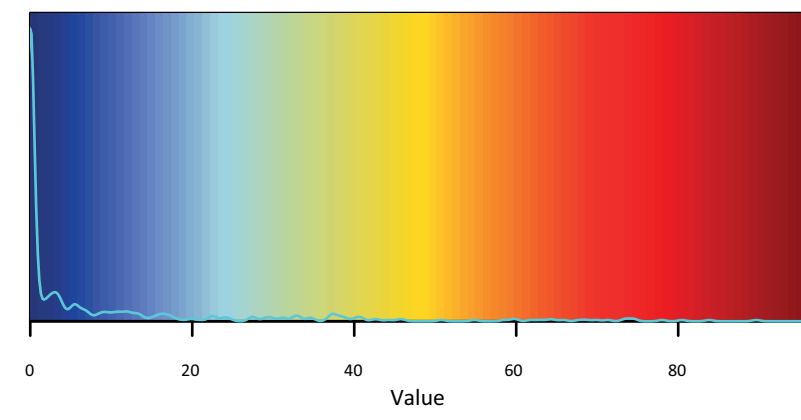

phylum

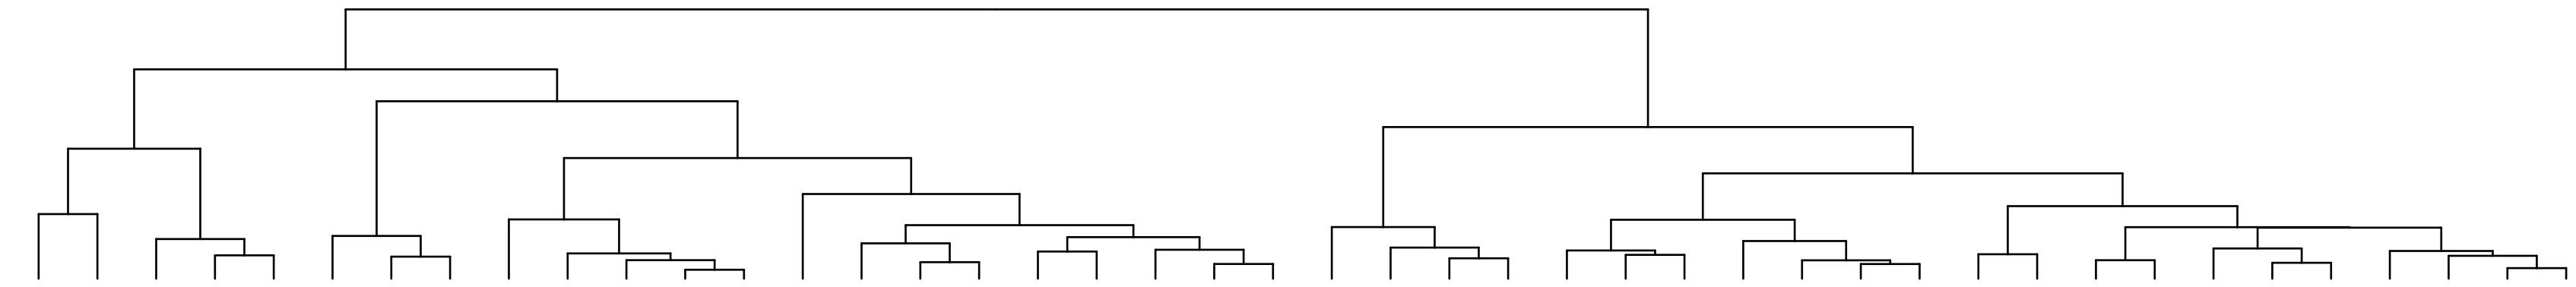

■ *Tc* -  
■ *Tc* +

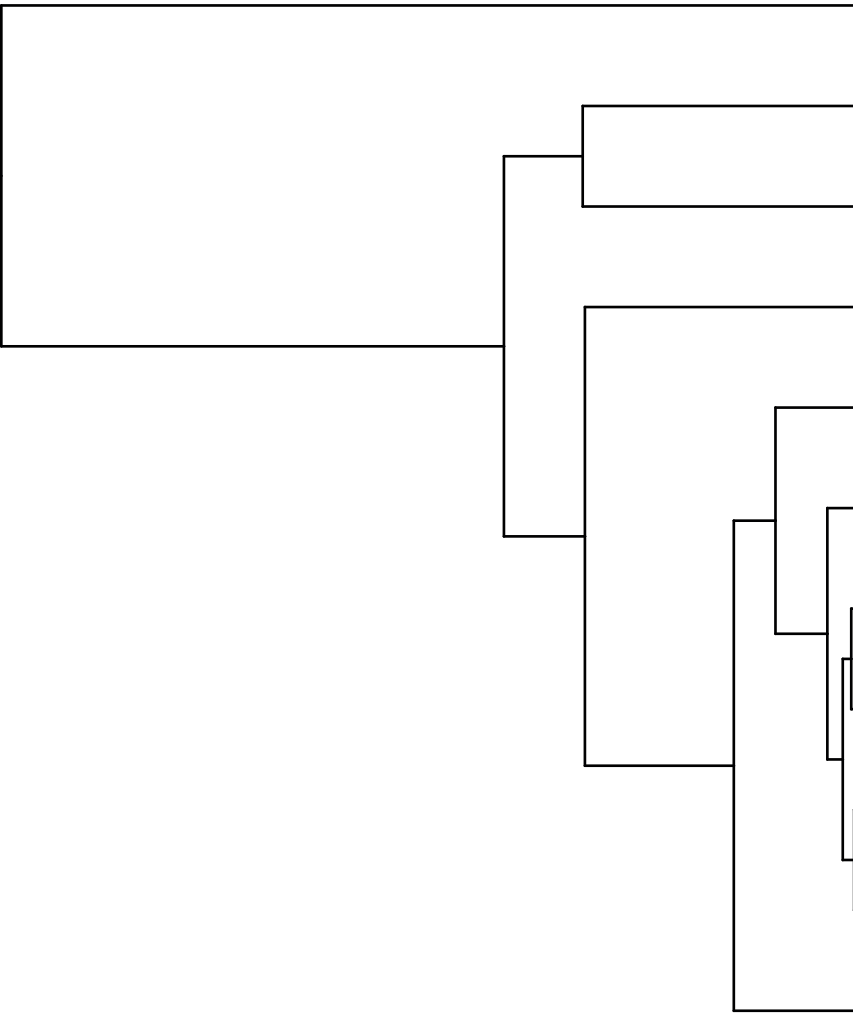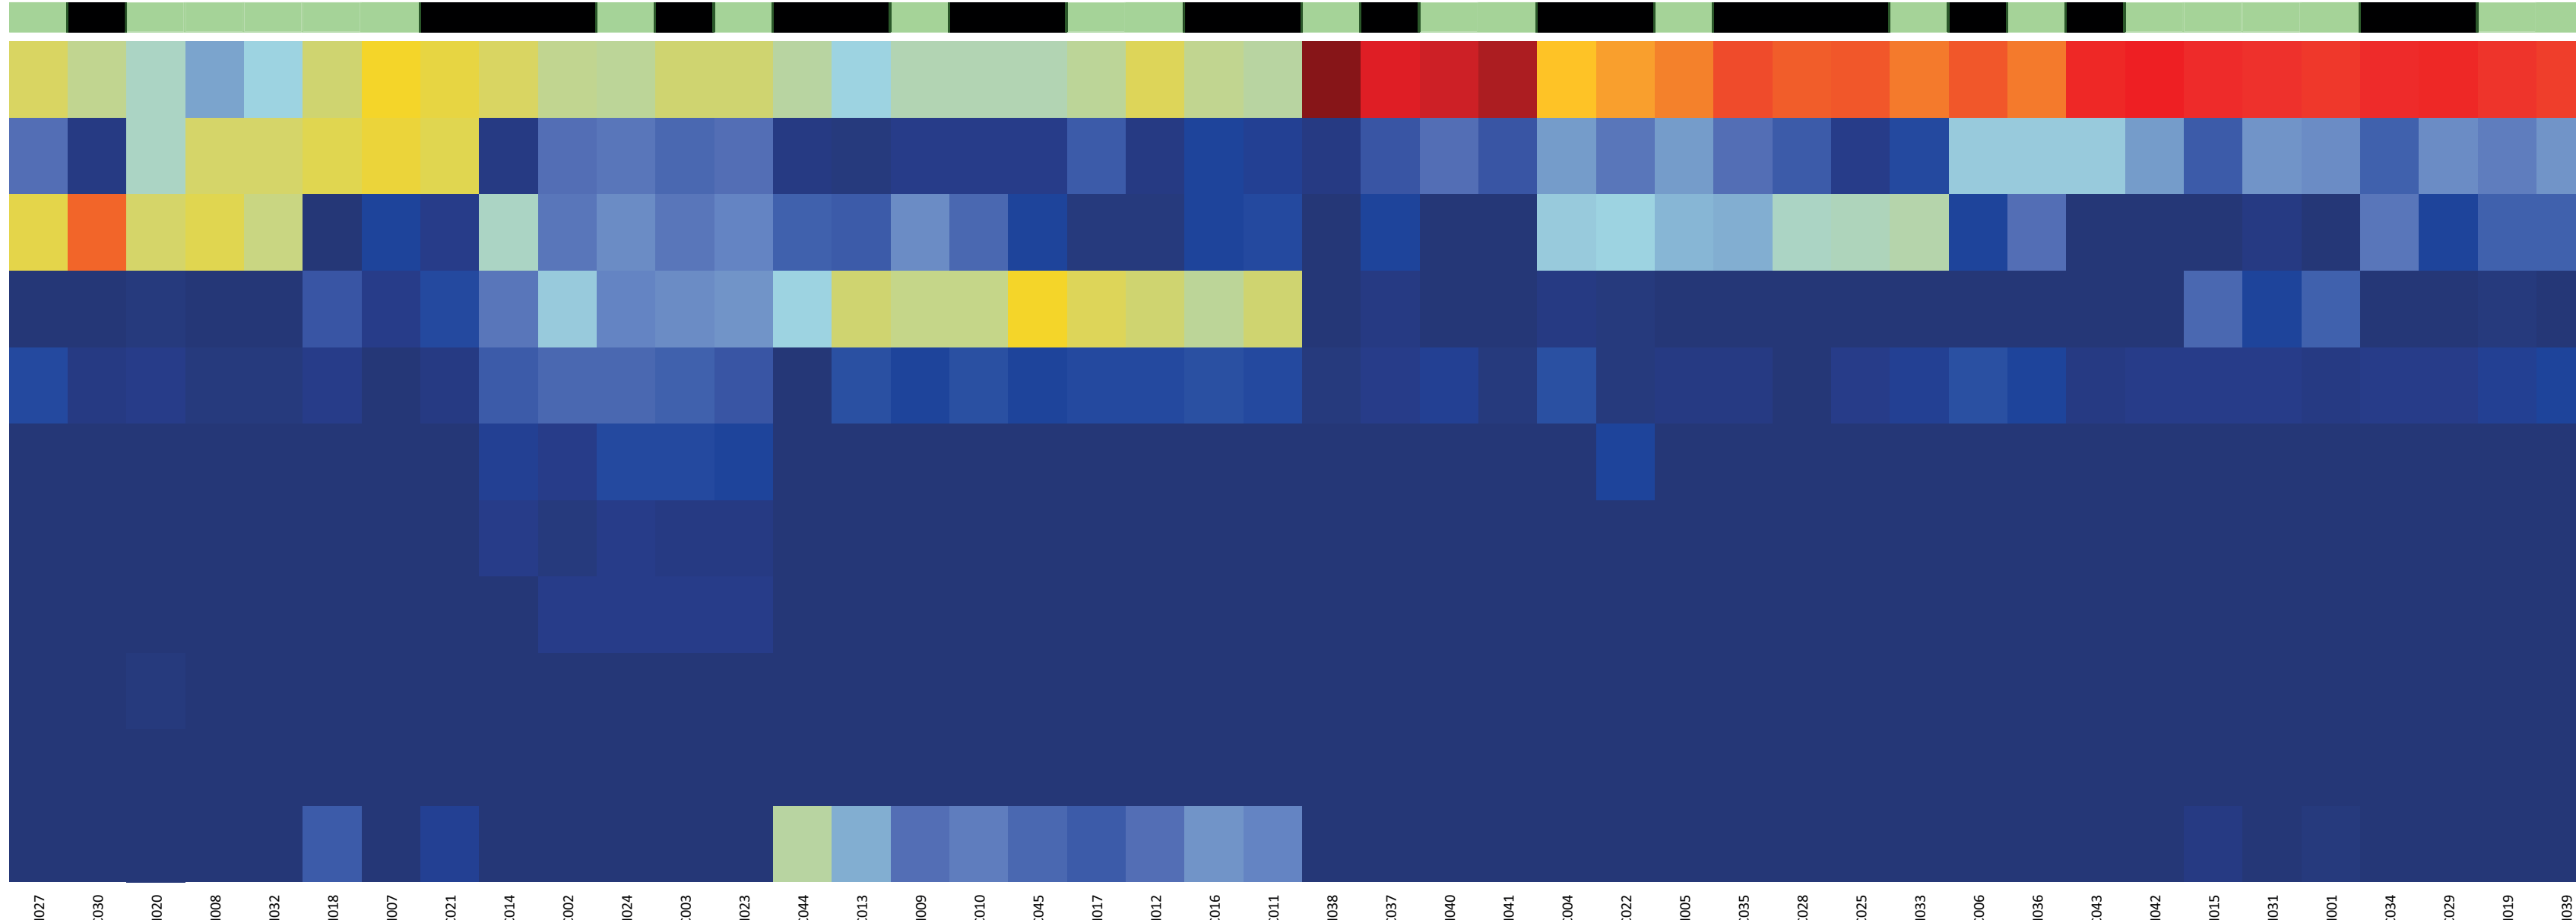

Firmicutes  
Actinobacteria  
Proteobacteria  
Bacteroidetes  
Unclassified  
X.Thermi  
Verrucomicrobia  
Gemmatimonadetes  
Chloroflexi  
Chlamydiae  
Fusobacteria
